# Supplementary material for: Assessment of shoulder range of motion using a commercially available wearable sensor—a validation study
Source: PubMed Central journal article supplement — Mhealth. 2022 Oct 30;8:30. doi: 10.21037/mhealth-22-7 (PMC9634209; doi:10.21037/mhealth-22-7), 2022-10-30
Supplement: mh-08-22-7-dss.pdf [file mh-08-22-7-dss.pdf]

## Data Sharing Statement

|                     |                                                                                                                                                    |                                                                                                                   |
|---------------------|----------------------------------------------------------------------------------------------------------------------------------------------------|-------------------------------------------------------------------------------------------------------------------|
| <b>Article Info</b> | <a href="https://dx.doi.org/10.21037/mhealth-22-7">https://dx.doi.org/10.21037/mhealth-22-7</a>                                                    |                                                                                                                   |
| <b>Item</b>         | <b>Question</b>                                                                                                                                    | <b>Authors' Response</b><br>(place "-" if not applicable)                                                         |
| 1                   | Would you like to share data collected for your study to others?                                                                                   | Data collected is available on request from the corresponding author.                                             |
| 2                   | If not, would you like to share the reason for your decision?                                                                                      | -                                                                                                                 |
| 3                   | What data in particular will be shared?                                                                                                            | Raw data on joint angles, validation analyses will be shared                                                      |
| 4                   | Any other documents will be share? Such as study protocol, statistical analysis plan, informed consent form, clinical study report, analytic code. | Analytic code is available on request from the corresponding author.                                              |
| 5                   | When will data availability begin?                                                                                                                 | Data availability will begin upon publication of this article.                                                    |
| 6                   | When will data availability end?                                                                                                                   | -                                                                                                                 |
| 7                   | To whom will you share the data?                                                                                                                   | Any researcher who may benefit from data sharing may request data from the corresponding author.                  |
| 8                   | For what type of analysis or purpose?                                                                                                              | Validation of results, comparison of results, or any other reason at the discernment of the corresponding author. |
| 9                   | How or where can the data/documents be obtained?                                                                                                   | The data may be obtained via email correspondence with the corresponding author.                                  |
| 10                  | Any other restrictions?                                                                                                                            | -                                                                                                                 |
