# Supplementary material for: Assessment of shoulder range of motion using a commercially available wearable sensor—a validation study
Source: PubMed Central journal article supplement — Mhealth. 2022 Oct 30;8:30. doi: 10.21037/mhealth-22-7 (PMC9634209; doi:10.21037/mhealth-22-7), 2022-10-30
Supplement: mh-08-22-7-supplementary.pdf [file mh-08-22-7-supplementary.pdf]

**Table S1** ISB coordinate system definitions

| Coordinate system | Markers                                                                                  | Coordinate system origin                                          | Coordinate system sign convention                                                      |
|-------------------|------------------------------------------------------------------------------------------|-------------------------------------------------------------------|----------------------------------------------------------------------------------------|
| Thorax            | Xiphoid process, Suprasternal notch, C7, T8                                              | Suprasternal notch                                                | Anterior (+X), Posterior (-X); Superior (+Y), Inferior (-Y); Lateral (+Z), Medial (-Z) |
| Scapula           | Inferior angle of the scapula, Acromial angle, Trigonum spinae                           | Acromial angle                                                    |                                                                                        |
| Humerus           | Medial epicondyle, Lateral epicondyle                                                    | Glenohumeral joint, which is estimated using sphere-fitting model |                                                                                        |
| Forearm           | Medial epicondyle, Lateral epicondyle, Ulnar styloid, Radial styloid, Dorsum of the hand | Ulnar styloid                                                     |                                                                                        |

ISB, International Society of Biomechanics.

**Table S2** Vector definitions for thorax and humerus coordinate systems

| Vectors                   | Description of vector definition                                                                    | Direction of vector |
|---------------------------|-----------------------------------------------------------------------------------------------------|---------------------|
| Thorax coordinate system  |                                                                                                     |                     |
| $Y_T$                     | Line connecting midpoint between PX and T8 with midpoint between IJ and C7                          | Pointing superiorly |
| $Z_T$                     | Line perpendicular to the plane formed by IJ and C7, and midpoint between PX and T8                 | Pointing laterally  |
| $X_T$                     | Common line perpendicular to the $Z_T$ and $Y_T$ axes                                               | Pointing anteriorly |
| Humerus coordinate system |                                                                                                     |                     |
| $Y_H$                     | Line connecting GH and midpoint of EL, EM, and GH. This gives the longitudinal axis of the humerus. | Pointing to GH      |
| $Z_H$                     | Line perpendicular to the $Y_H$ and $X_H$ axis                                                      | Pointing laterally  |
| $X_H$                     | Line perpendicular to the plane formed by EL, EM, and GH                                            | Pointing anteriorly |

C7, spinous process of 7<sup>th</sup> cervical vertebra; EL, lateral epicondyle; EM, medial epicondyle; GH, glenohumeral rotation center; IJ, Incisura Jugularis (Suprasternal notch); PX, xiphoid process; T8, spinous process of 8<sup>th</sup> thoracic vertebra.
